# Supplementary material for: Attitudes towards and use of dental dams by final-year dental students in Chongqing, China: a cross-sectional study
Source: HighWire-hosted journal article supplement (doi:10.1136/bmjopen-2021-059148), 2022-07-01
Supplement: bmjopen-2021-059148supp001_data_supplement.pdf [file bmjopen-2021-059148supp001_data_supplement.pdf]

## Questionnaire on attitudes toward and use of dental dams among final-year dental students in Chongqing

1. The name of the university you attended or graduated from: [Single choice questions]

- Chongqing Medical University
- Chongqing Three Gorges Medical College

2. Your gender: [Single choice questions]

- Male
- Female

3. Your age: [Fill-in-the-blanks test]

\_\_\_\_\_

4. Please select the form of dental dam training you have received: [Multiple choice questions]

- Listening to theoretical lectures in the school classroom
- Listening to small lectures or other forms of theoretical training in internship institutions
- Watching video, animation and other multimedia teaching resources
- Watching a teacher's demonstration on the tooth model
- Watching a teacher's demonstration on simulated patients
- Watching a teacher's demonstration on a real patient during the internship
- Practicing on a tooth model
- Practicing on simulated patients
- Practicing real patients during the internship

5. Please choose the dental dam training you are satisfied with: [Multiple choice questions]

- Theoretical teaching
- Watching multimedia resources
- Watching teacher demonstrations
- Simulation exercises
- Clinical practice

6. Please assess your current mastery of dental dam technology: [Single choice questions]

- I basically do not have knowledge of dental dams. (Level 0)
- I have some knowledge but have no practical experience. (Level 1)
- I have some knowledge and have handled simple cases but cannot handle complex cases. (Level 2)
- I have fully mastered the dental dam application and can handle any situation. (Level 3)

7. Do you think you have received adequate dental dam training in dental school? [Single choice questions]

- Yes
- No

8. Are you willing to receive further training in the use of dental dams? [Single choice questions]

(If “no” is selected, Q9 does not need to be answered)

Yes No

9. Please select the areas where you would like to receive further training on dental dam use: [Multiple choice questions]

- Theoretical teaching
- Watching multimedia resources
- Watching teacher demonstrations
- Simulation exercises
- Clinical practice

10. Please select the type of internship institution you worked in during your last year of internship: [Single choice questions]

- Public stomatological hospital
- Stomatological department of public general hospital
- Private clinics

11. Please select the type of clinical instructor(s) who has instructed you: [Multiple choice questions]

- Endodontic specialist
- General dental practitioner
- Nonendodontic specialist

12. In the internship institution, have you received dental dam clinical training? [Single choice questions]

(If “no” is selected, Q13 does not need to be answered)

Yes No

13. Please select the type of clinical instructor(s) who instructed you to use the dental dam during your internship: [Multiple choice questions]

- Endodontic specialist
- General dental practitioner
- Nonendodontic specialist

14. Have you ever treated adult patients in your internship? [Single choice questions]

(If “no” is selected, Q14(1) and Q14(2) do not need to be answered.)

Yes No

(1) How often do you use dental dams on adult patients? [Single choice questions]

- Always (100%)
- Mostly (76–99%)
- Often (51–75%)
- Occasionally (26–50%)
- Rarely (1–25%)
- Never (0%)

(2) Is the use of dental dams mandatory or optional when you treat adult patients?

[Single choice questions]

Mandatory Optional

15. Have you ever treated child patients in your internship? [Single choice questions]  
(If “no” is selected, Q15(1) and Q15(2) do not need to be answered.)

Yes  No

(1) How often do you use dental dams on child patients? [Single choice questions]

- Always (100%)
- Mostly (76–99%)
- Often (51–75%)
- Occasionally (26–50%)
- Rarely (1–25%)
- Never (0%)

(2) Is the use of dental dams mandatory or optional when you treat child patients?  
[Single choice questions]

Mandatory  Optional

16. During your internship, have you ever performed anterior composites? [Single choice questions]

(If “no” is selected, Q16(1) and Q16(2) do not need to be answered.)

Yes  No

(1) How often do you use the dental dam for anterior composites? [Single choice questions]

- Always (100%)
- Mostly (76–99%)
- Often (51–75%)
- Occasionally (26–50%)
- Rarely (1–25%)
- Never (0%)

(2) Is the use of dental dams mandatory or optional when performing anterior composites? [Single choice questions]

Mandatory  Optional

17. During your internship, have you ever performed anterior glass-ionomer cement?  
[Single choice questions]

(If “no” is selected, Q17(1) and Q17(2) do not need to be answered.)

Yes  No

(1) How often do you use the dental dam for anterior glass-ionomer cement? [Single choice questions]

- Always (100%)
- Mostly (76–99%)
- Often (51–75%)
- Occasionally (26–50%)
- Rarely (1–25%)
- Never (0%)

(2) Is the use of dental dams mandatory or optional when performing anterior glass-ionomer cement? [Single choice questions]

Mandatory  Optional

18. During your internship, have you ever performed posterior composites? [Single choice questions]

(If “no” is selected, Q18(1) and Q18(2) do not need to be answered)

Yes  No

(1) How often do you use the dental dam for posterior composites? [Single choice questions]

- Always (100%)
- Mostly (76–99%)
- Often (51–75%)
- Occasionally (26–50%)
- Rarely (1–25%)
- Never (0%)

(2) Is the use of dental dams mandatory or optional when performing posterior composites? [Single choice questions]

Mandatory  Optional

19. During your internship, have you ever performed posterior glass-ionomer cement? [Single choice questions]

(If “no” is selected, Q19(1) and Q19(2) do not need to be answered.)

Yes  No

(1) How often do you use the dental dam for posterior glass-ionomer cement? [Single choice questions]

- Always (100%)
- Mostly (76–99%)
- Often (51–75%)
- Occasionally (26–50%)
- Rarely (1–25%)
- Never (0%)

(2) Is the use of dental dams mandatory or optional when performing posterior glass-ionomer cement? [Single choice questions]

Mandatory  Optional

20. During your internship, have you ever performed posterior amalgams? [Single choice questions]

(If “no” is selected, Q20(1) and Q20(2) do not need to be answered.)

Yes  No

(1) How often do you use the dental dam for posterior amalgams? [Single choice questions]

- Always (100%)
- Mostly (76–99%)
- Often (51–75%)
- Occasionally (26–50%)
- Rarely (1–25%)
- Never (0%)

(2) Is the use of dental dams mandatory or optional when performing posterior amalgams? [Single choice questions]

Mandatory  Optional

21. During your internship, have you ever performed root canal treatment of anterior teeth? [Single choice questions]

(If “no” is selected, Q21(1) and Q21(2) do not need to be answered)

Yes  No

(1) How often do you use the dental dam for root canal treatment of anterior teeth?

[Single choice questions]

- Always (100%)
- Mostly (76–99%)
- Often (51–75%)
- Occasionally (26–50%)
- Rarely (1–25%)
- Never (0%)

(2) Is the use of dental dams mandatory or optional when root canal treatment of anterior teeth is performed? [Single choice questions]

- Mandatory
- Optional

22. During your internship, have you ever performed root canal treatment of premolar teeth? [Single choice questions]

(If “no” is selected, Q22(1) and Q22(2) do not need to be answered)

- Yes
- No

(1) How often do you use the dental dam for root canal treatment of premolar teeth?

[Single choice questions]

- Always (100%)
- Mostly (76–99%)
- Often (51–75%)
- Occasionally (26–50%)
- Rarely (1–25%)
- Never (0%)

(2) Is the use of dental dams mandatory or optional when root canal treatment of premolar teeth is performed? [Single choice questions]

- Mandatory
- Optional

23. During your internship, have you ever performed root canal treatment of molar teeth? [Single choice questions]

(If “no” is selected, Q23(1) and Q23(2) do not need to be answered.)

- Yes
- No

(1) How often do you use the dental dam for root canal treatment of molar teeth?

[Single choice questions]

- Always (100%)
- Mostly (76–99%)
- Often (51–75%)
- Occasionally (26–50%)
- Rarely (1–25%)
- Never (0%)

(2) Is the use of dental dams mandatory or optional when root canal treatment of molar teeth is performed? [Single choice questions]

- Mandatory
- Optional

24. During your internship, have you used dental dams in restorative procedures?

[Single choice questions]

(If “yes” is selected, Q25 does not need to be answered)

- Yes
- No

25. Please select the reason you do not use the dental dam in the restorative procedures: [Multiple choice questions]

- Dental dams are considered to have disadvantages (such as time-consuming, inconvenient, etc.)
- I lack knowledge and experience
- I do not think they are necessary
- Dental dams are not provided by internship institutions
- Patients were unwilling or refused to use dental dams
- Other reasons

26. During your internship, have you used dental dams in endodontic treatment?

[Single choice questions]

(If “yes” is selected, Q27 does not need to be answered)

- Yes No

27. Please select the reason you do not use the dental dam in the endodontic treatment: [Multiple choice questions]

- Dental dams are considered to have disadvantages (such as time-consuming, inconvenient, etc.)
- I lack knowledge and experience
- I do not think they are necessary
- Dental dams are not provided by internship institutions
- Patients were unwilling or refused to use dental dams
- Other reasons

28. Do you agree that adequate isolation cannot be achieved if a dental dam is not used? [Single choice questions]

- Yes No

29. Do you agree that a dental dam enables clearer access to the operating site?

[Single choice questions]

- Yes No

30. Do you agree that the difficulty of the restoration phase is reduced once a dental dam is used? [Single choice questions]

- Yes No

31. Do you agree that the use of a dental dam can reduce the incidence of swallowing or inhaling? [Single choice questions]

- Yes No

32. Do you agree that dental dam placement should be compulsory before endodontic treatment? [Single choice questions]

- Yes No

33. Do you agree that a dental dam is difficult to apply? [Single choice questions]

- Yes No

34. Do you agree that a dental dam enables a higher clinical standard to be achieved?

[Single choice questions]

- Yes No

35. Do you agree that restorations placed while using a dental dam have greater longevity than those placed without the use of a dental dam? [Single choice questions]  
 Yes  No
36. Do you agree that a dental dam increases the difficulty of intraoperative radiography? [Single choice questions]  
 Yes  No
37. Do you agree that assistance is necessary during dental dam application? [Single choice questions]  
 Yes  No
38. Do you agree that patients do not like to use dental dams? [Single choice questions]  
 Yes  No
39. Do you agree that dental dam application is time-consuming and reduces work efficiency? [Single choice questions]  
 Yes  No
40. Do you agree that before using a dental dam, the patient should be asked about the allergy history of latex materials? [Single choice questions]  
 Yes  No
41. Would you like to use a dental dam in your private practices following graduation? [Single choice questions]  
(If “I will never use it” is selected, Q42 and Q43 do not need to be answered)  
 I intend to use the dental dam  
 I will never use it
42. In private practice, what kind of patients would you like to use dental dams on? [Single choice questions]  
 Only adults  
 Only children  
 Both adults and children
43. In private practice, for what kind of procedure would you like to use dental dams? [Single choice questions]  
 Only endodontic treatment  
 Only restorative procedures  
 All procedures indicated
